# Supplementary material
Source: PubMed Central journal article supplement (PMC7533040)

# Supplementary Figure 1

## MED19-FLAG

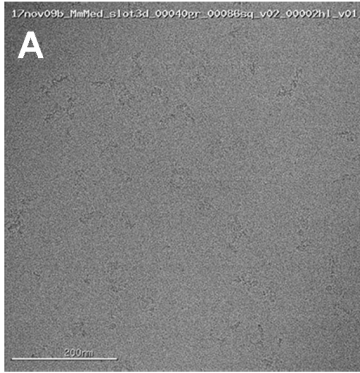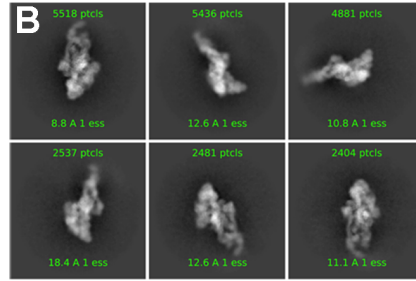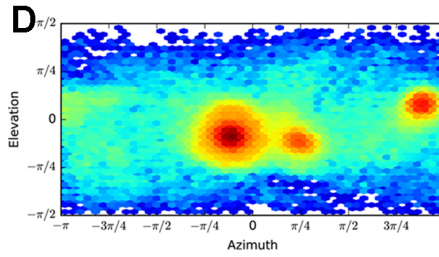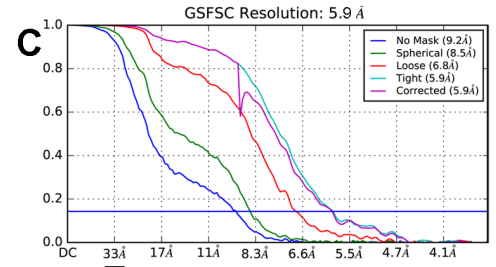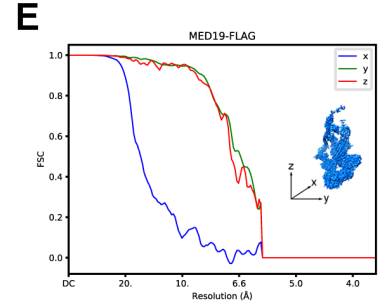

## MED25-FLAG

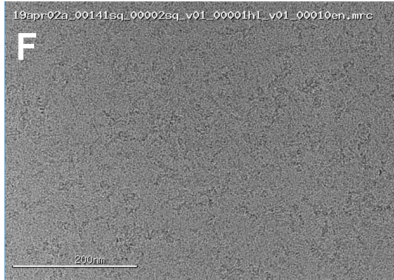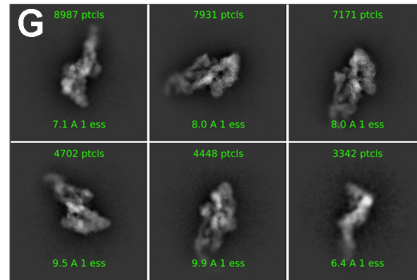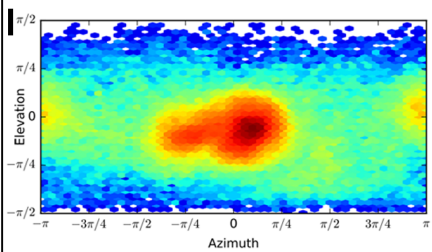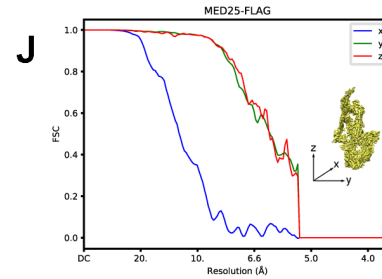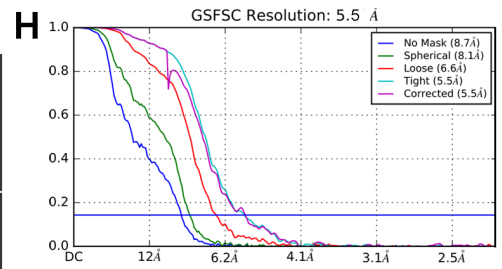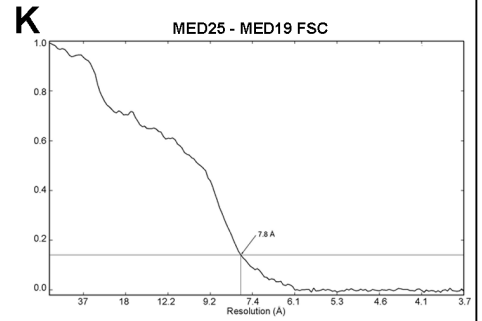

## ΔMED1

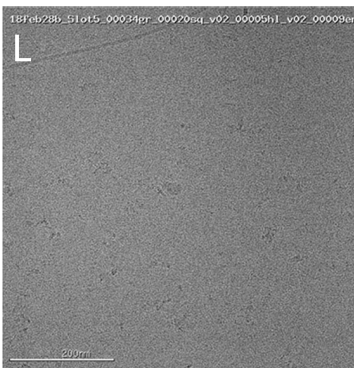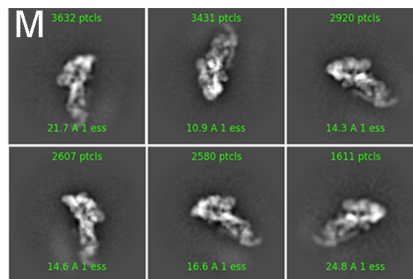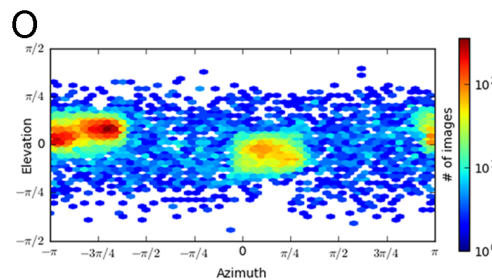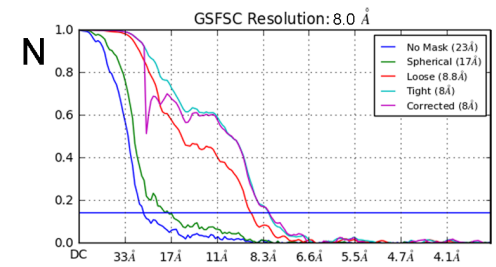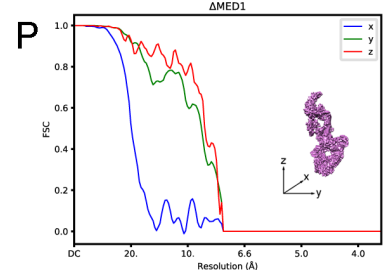

Supplement: NIHMS1537171-supplement-1.pdf [file NIHMS1537171-supplement-1.pdf]

## Supplementary Figure 2

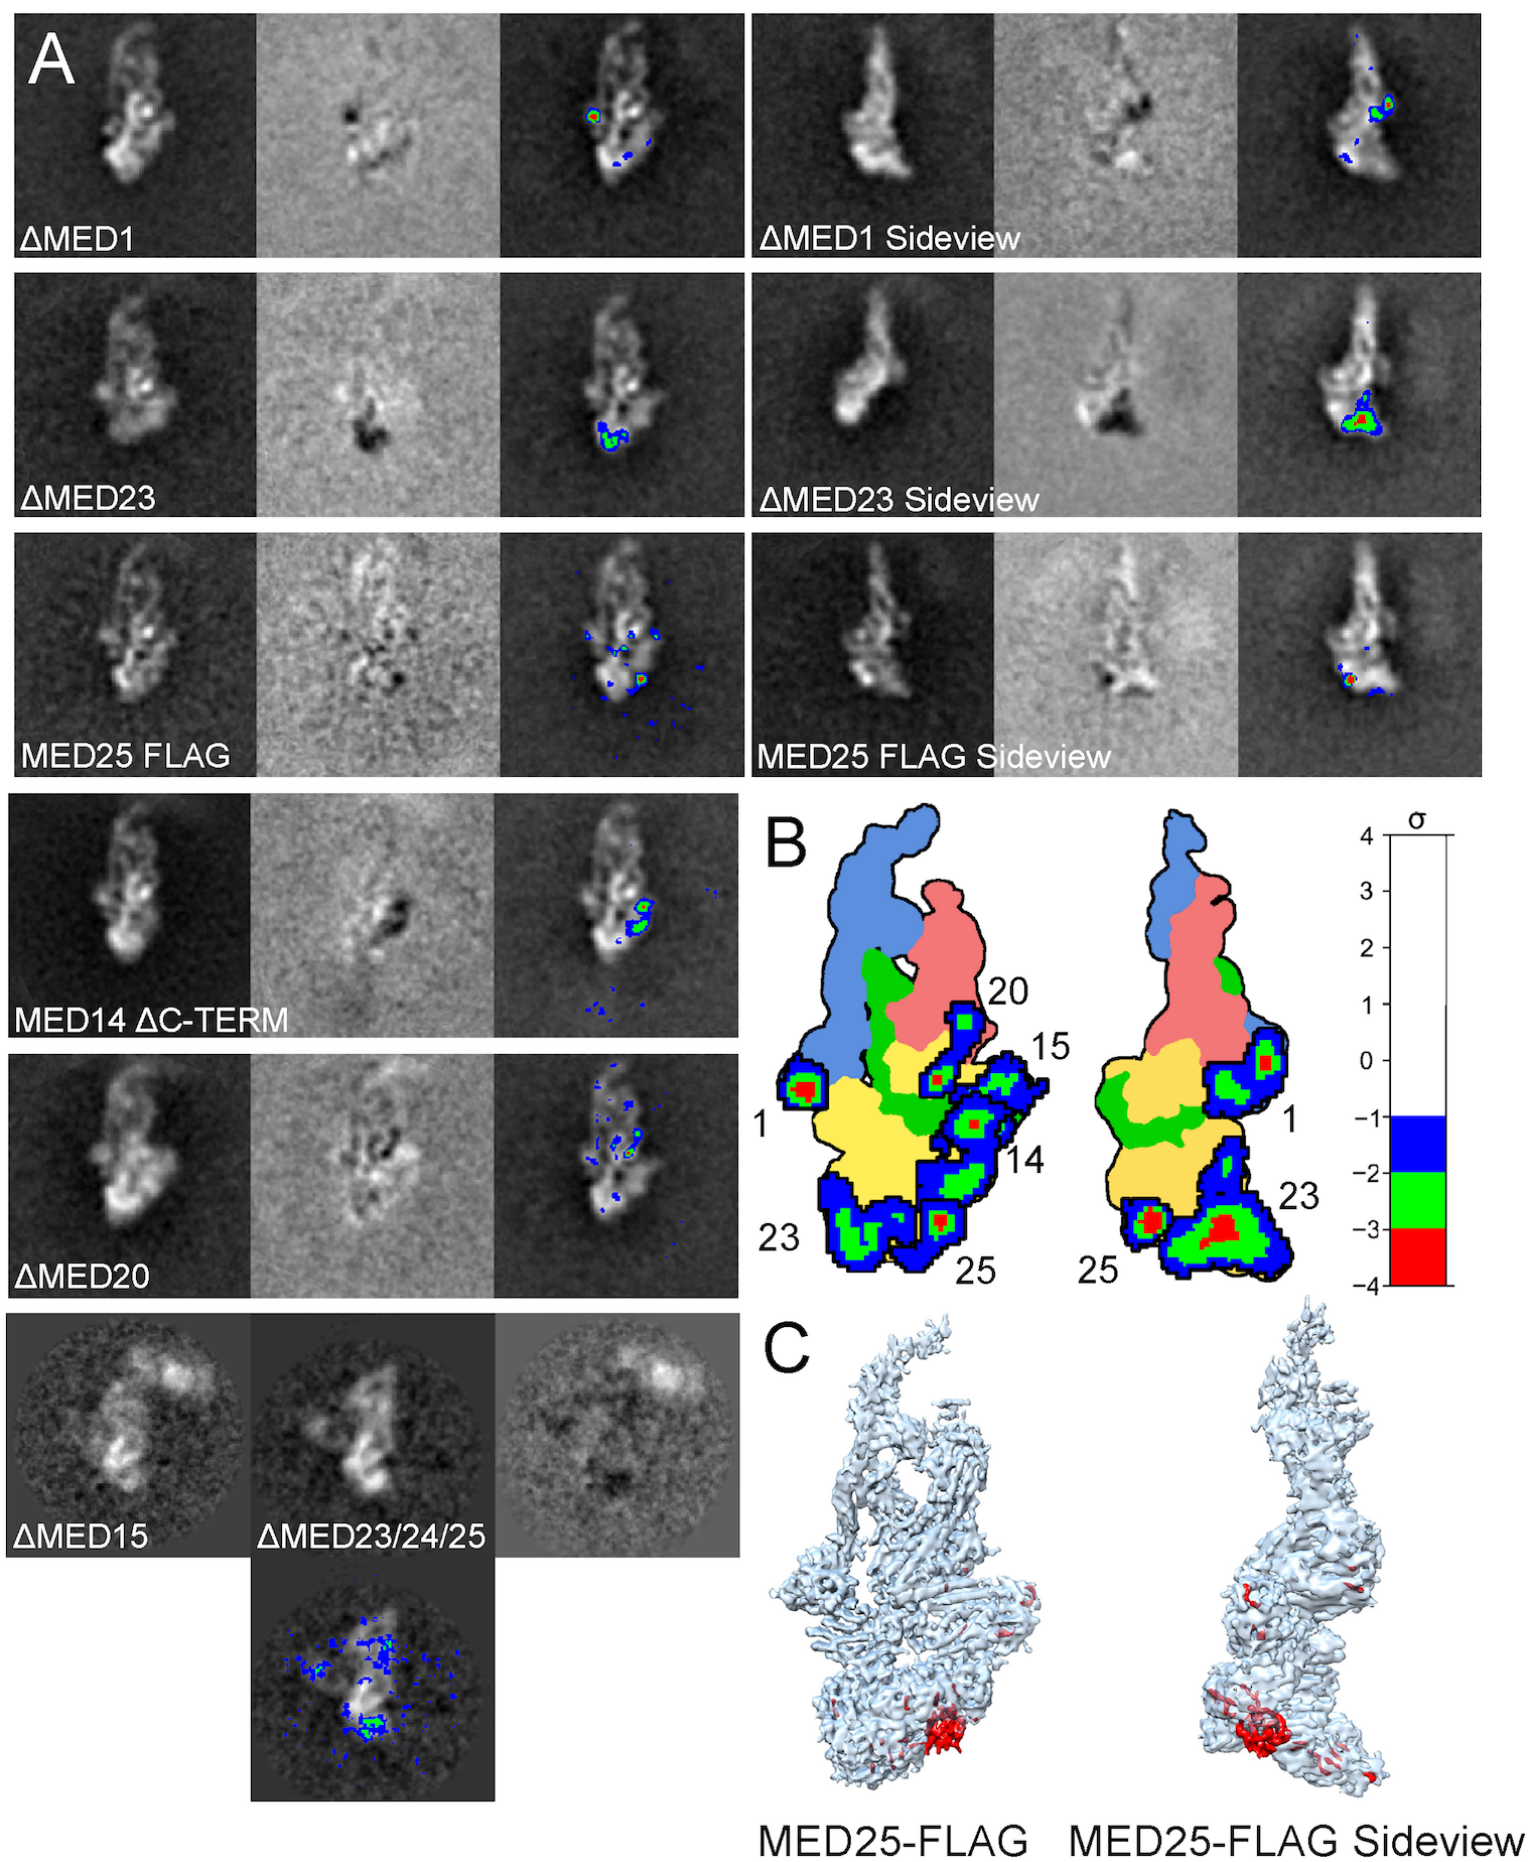

Supplement: NIHMS1537171-supplement-2.pdf [file NIHMS1537171-supplement-2.pdf]

### Supplementary Figure 3

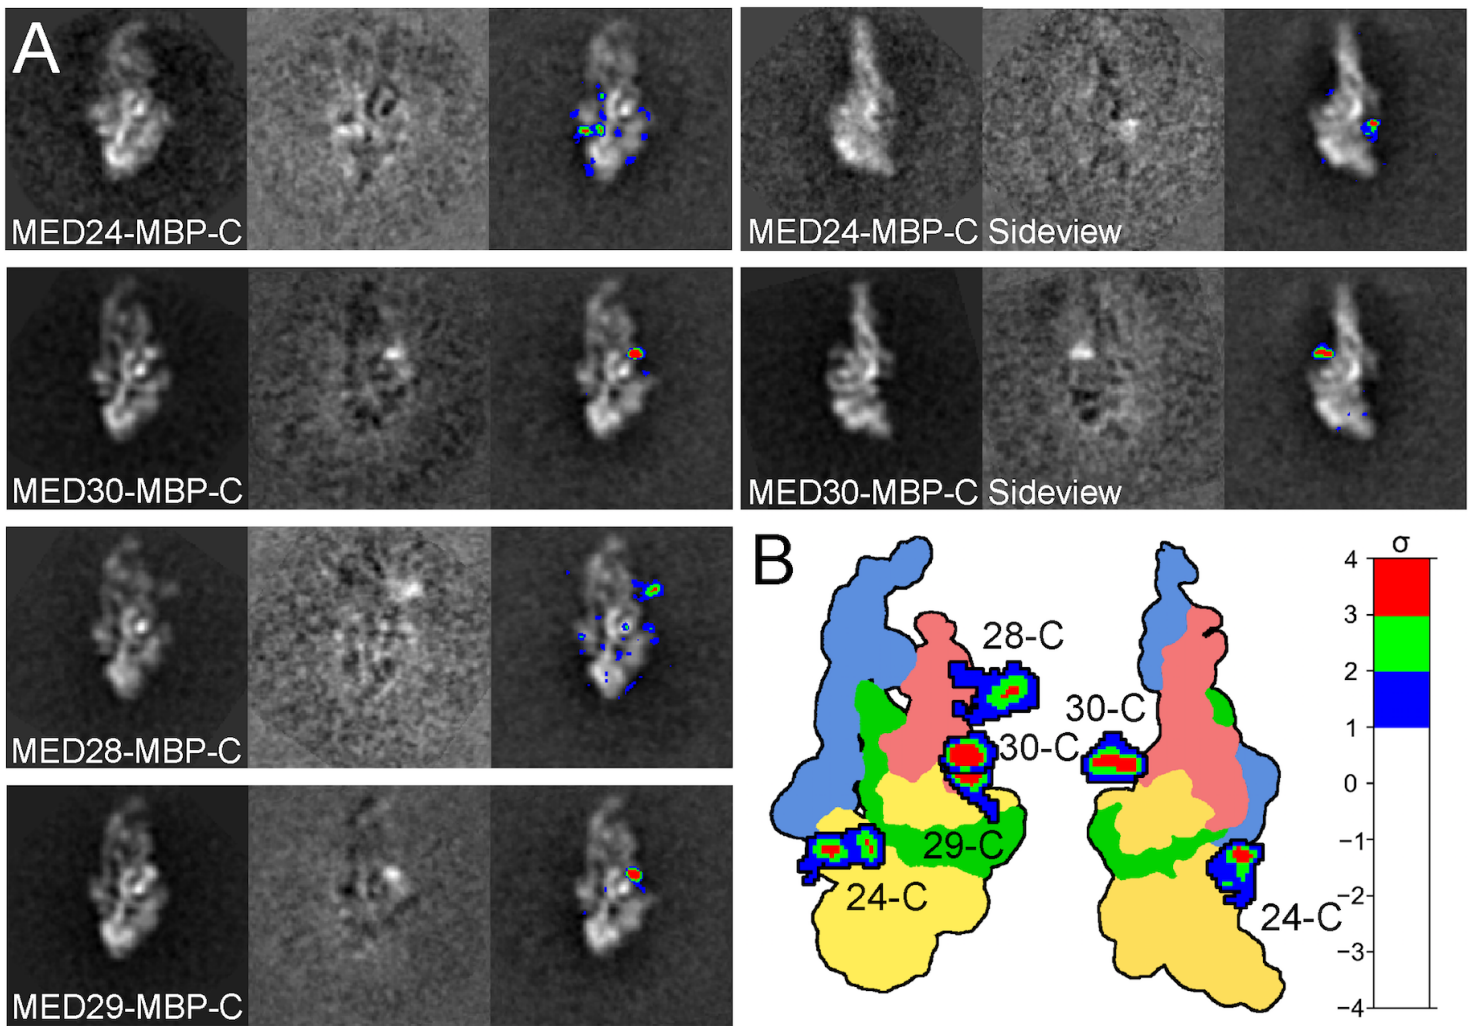

Supplement: NIHMS1537171-supplement-3.pdf [file NIHMS1537171-supplement-3.pdf]

## Supplementary Figure 4

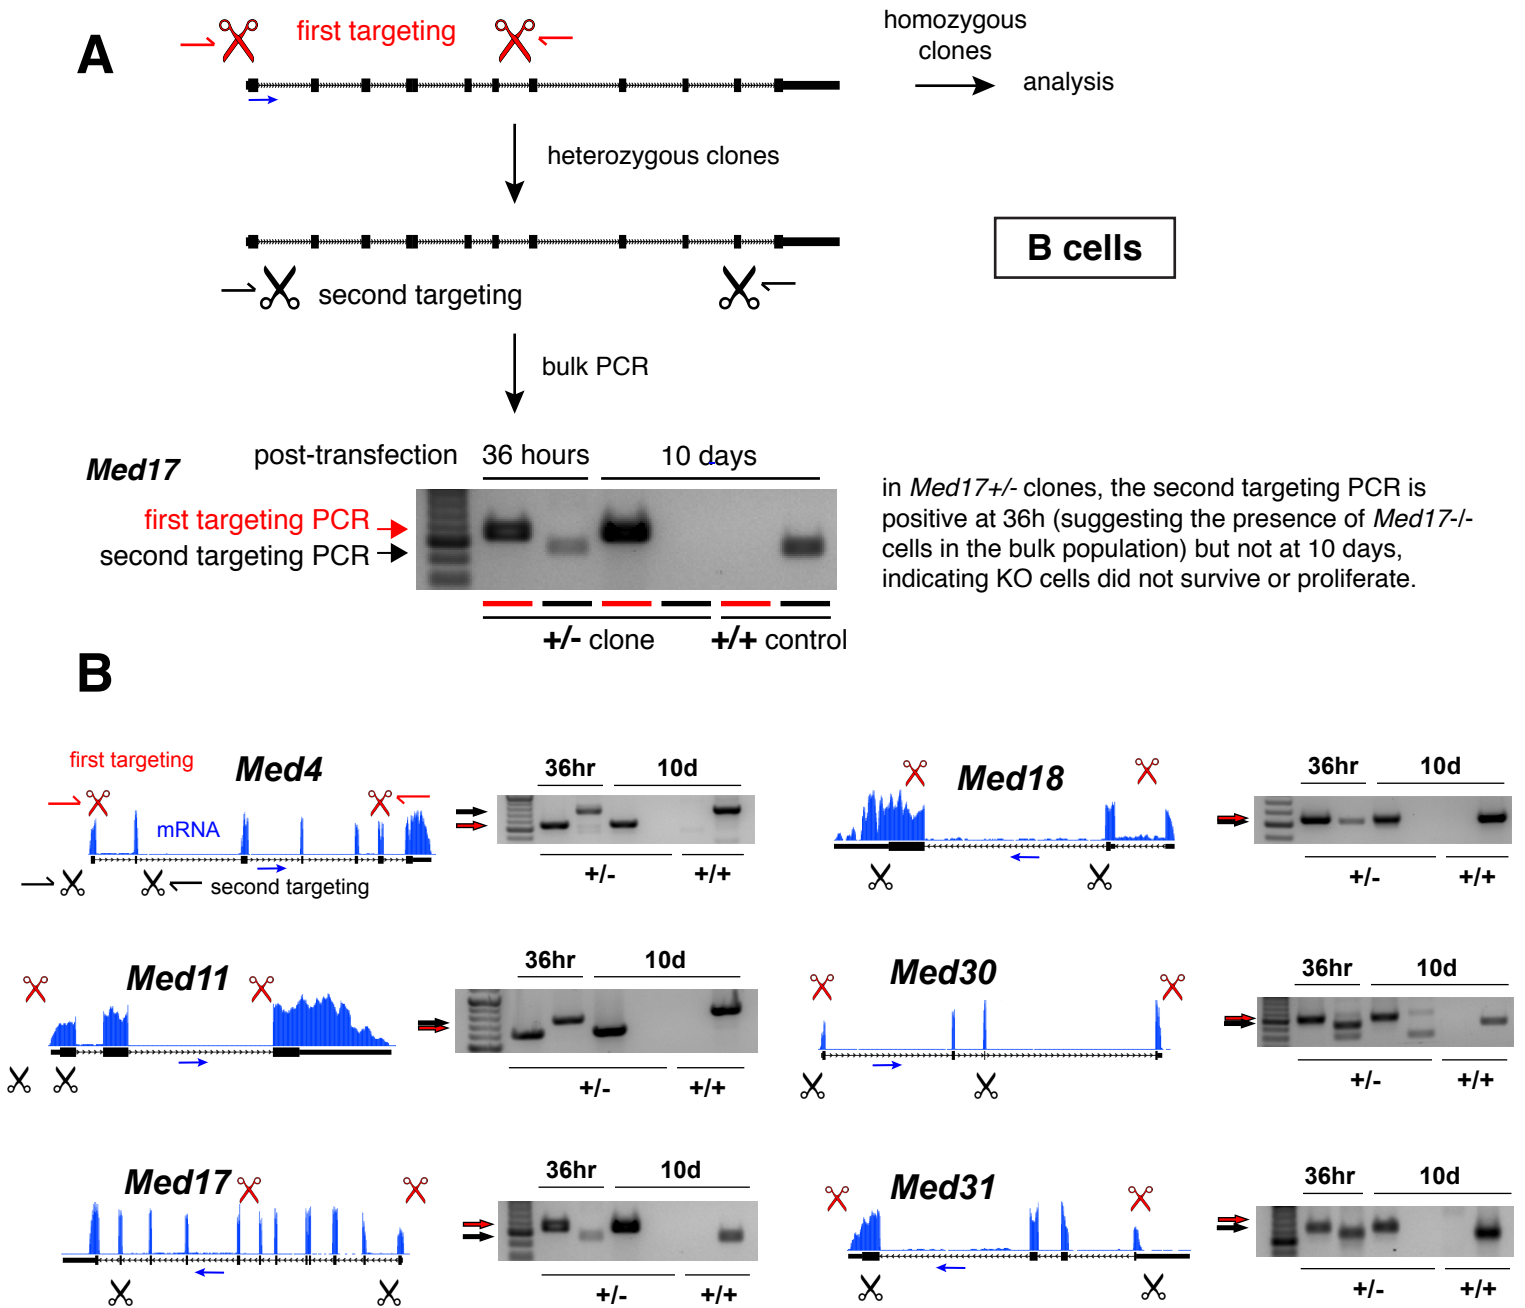

Supplement: NIHMS1537171-supplement-4.pdf [file NIHMS1537171-supplement-4.pdf]

# Supplementary Figure 5

**A**

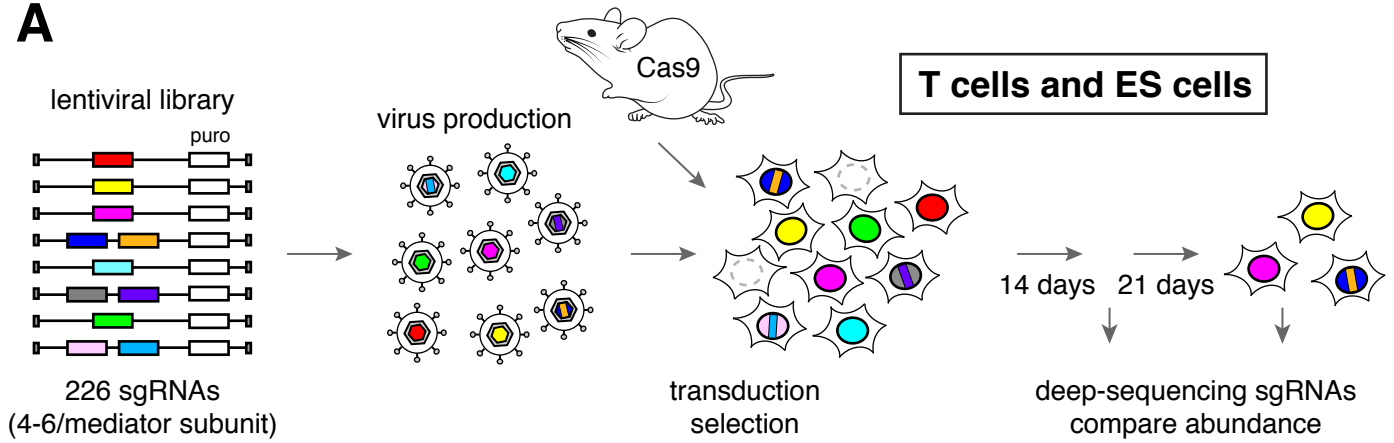

**B**

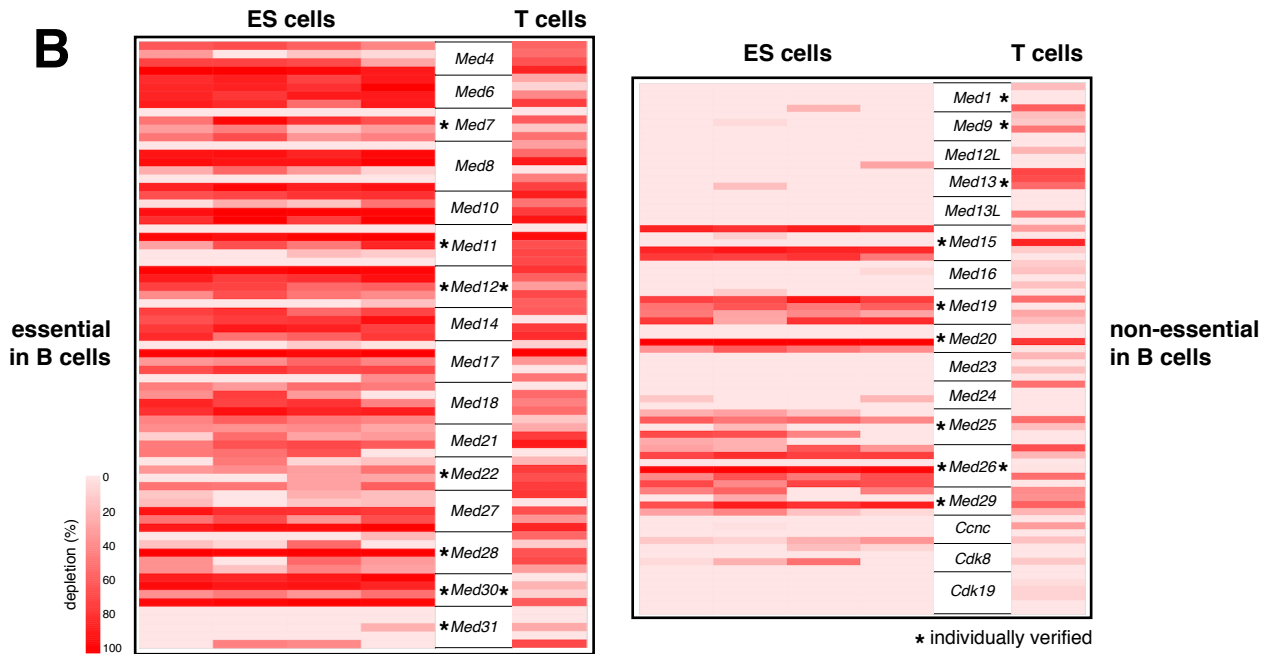

**C**

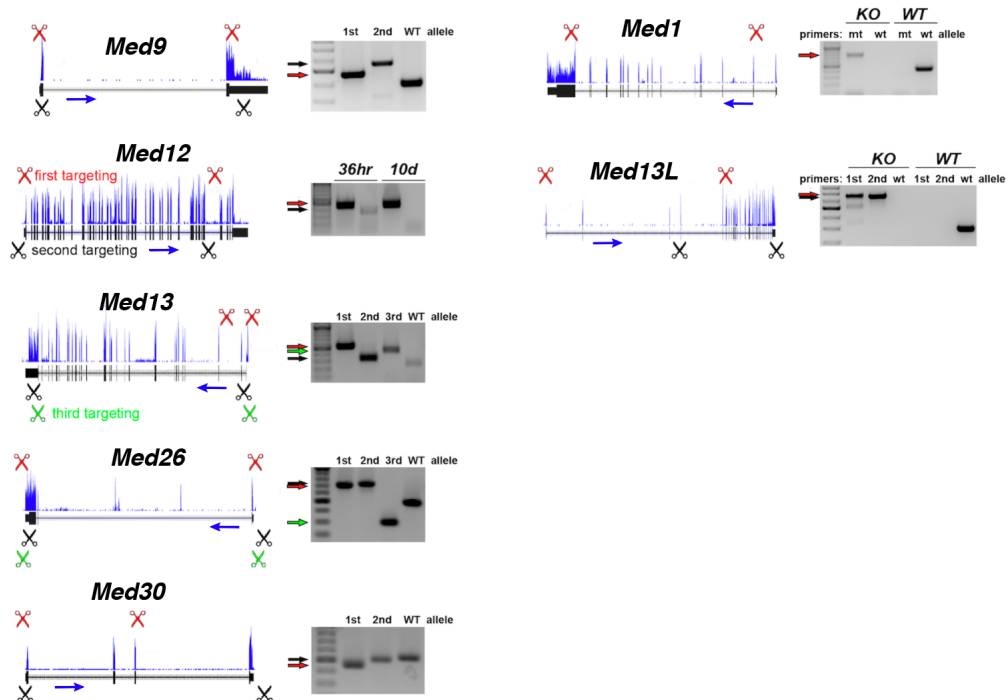

Supplement: NIHMS1537171-supplement-5.pdf [file NIHMS1537171-supplement-5.pdf]

# Supplementary Figure 6

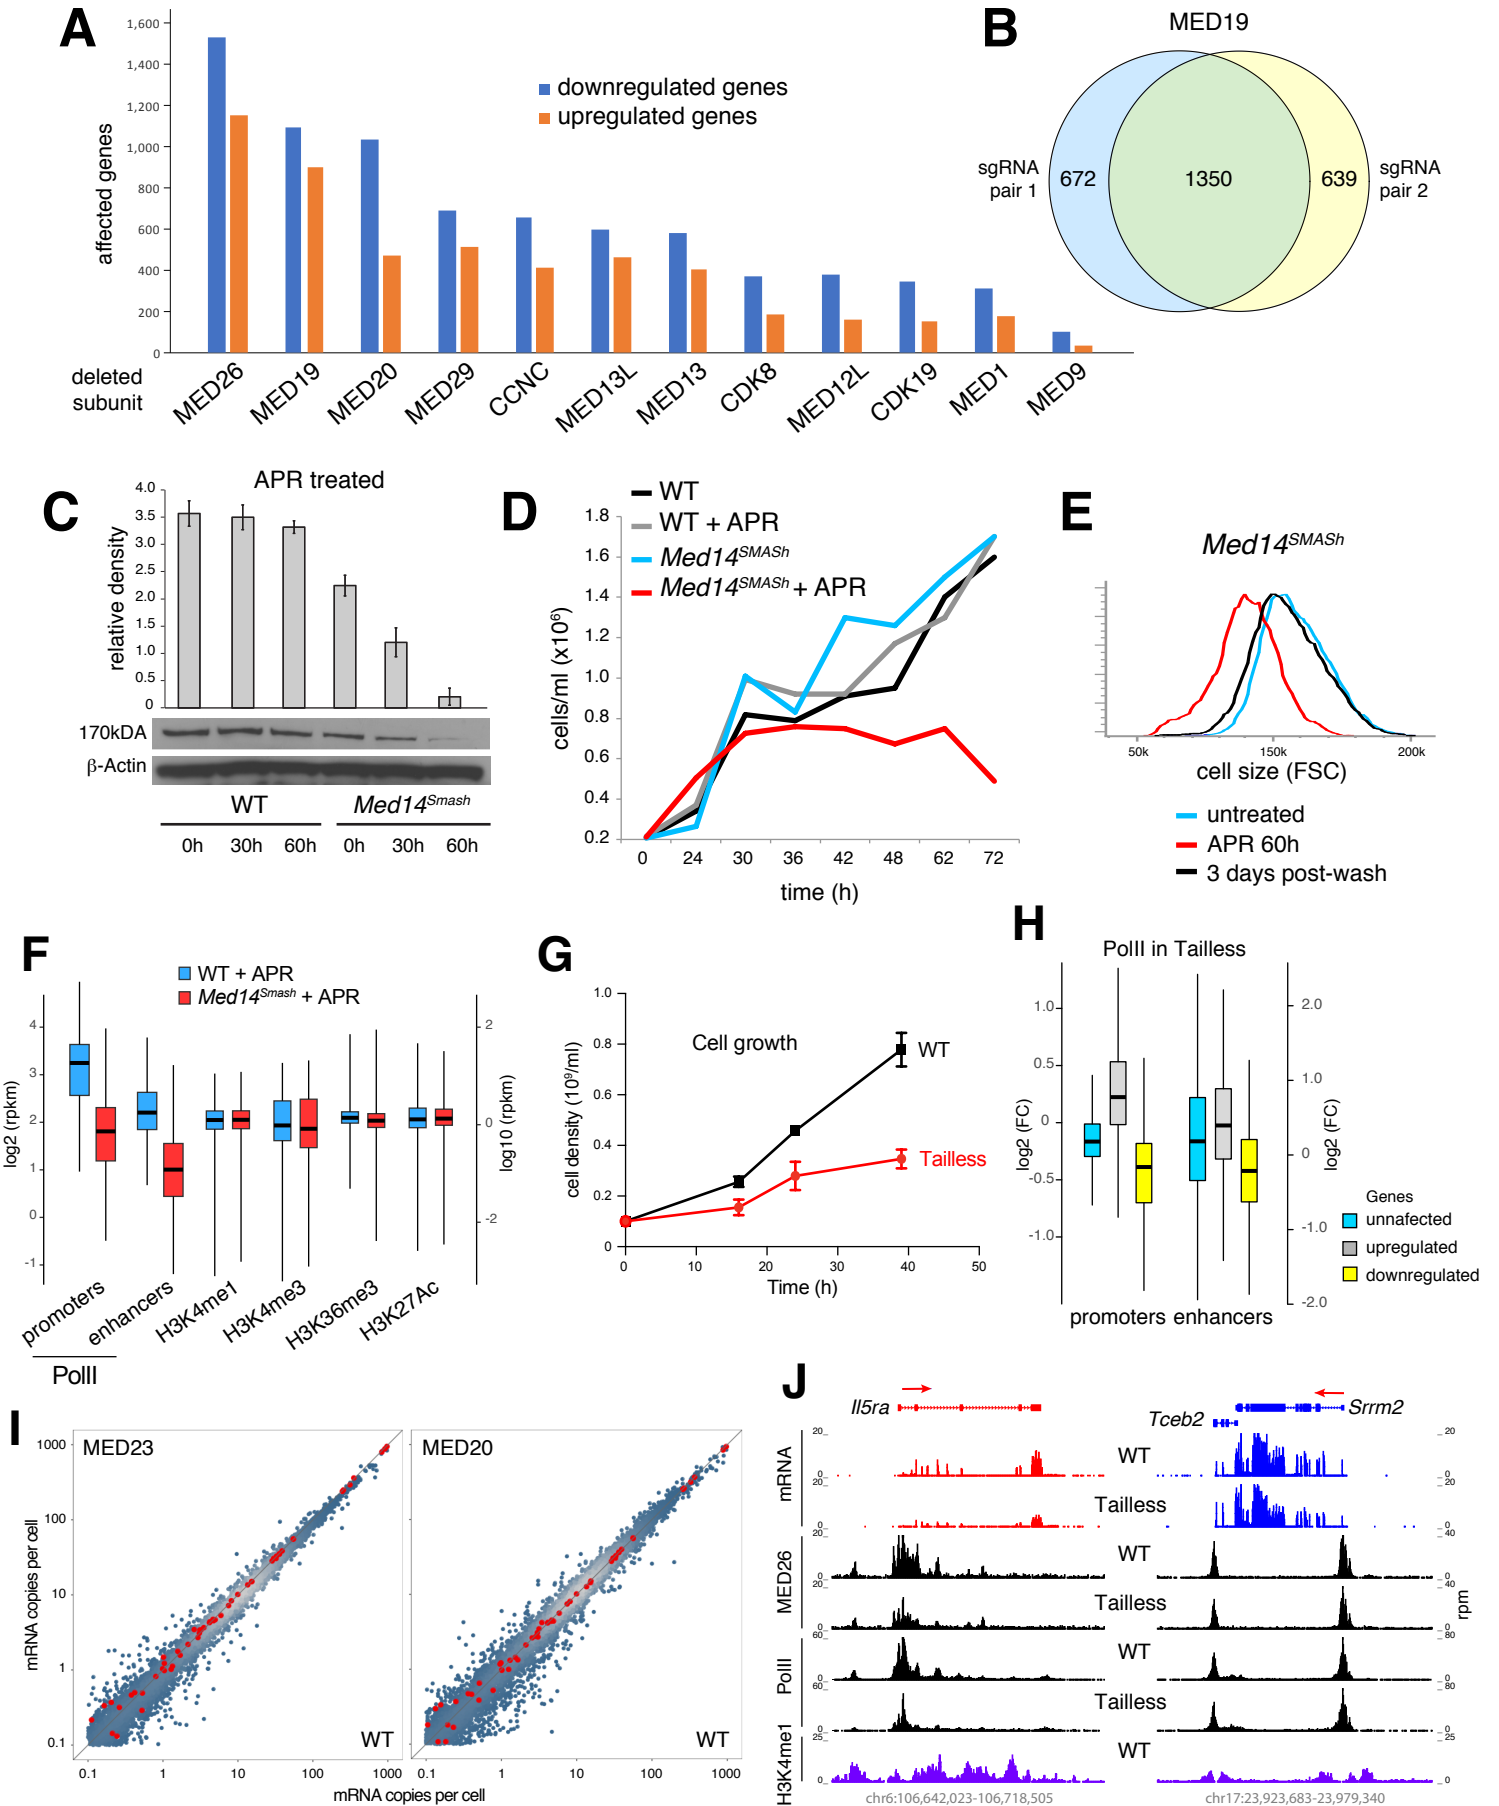

Supplement: NIHMS1537171-supplement-6.pdf [file NIHMS1537171-supplement-6.pdf]

# Supplementary Figure 7

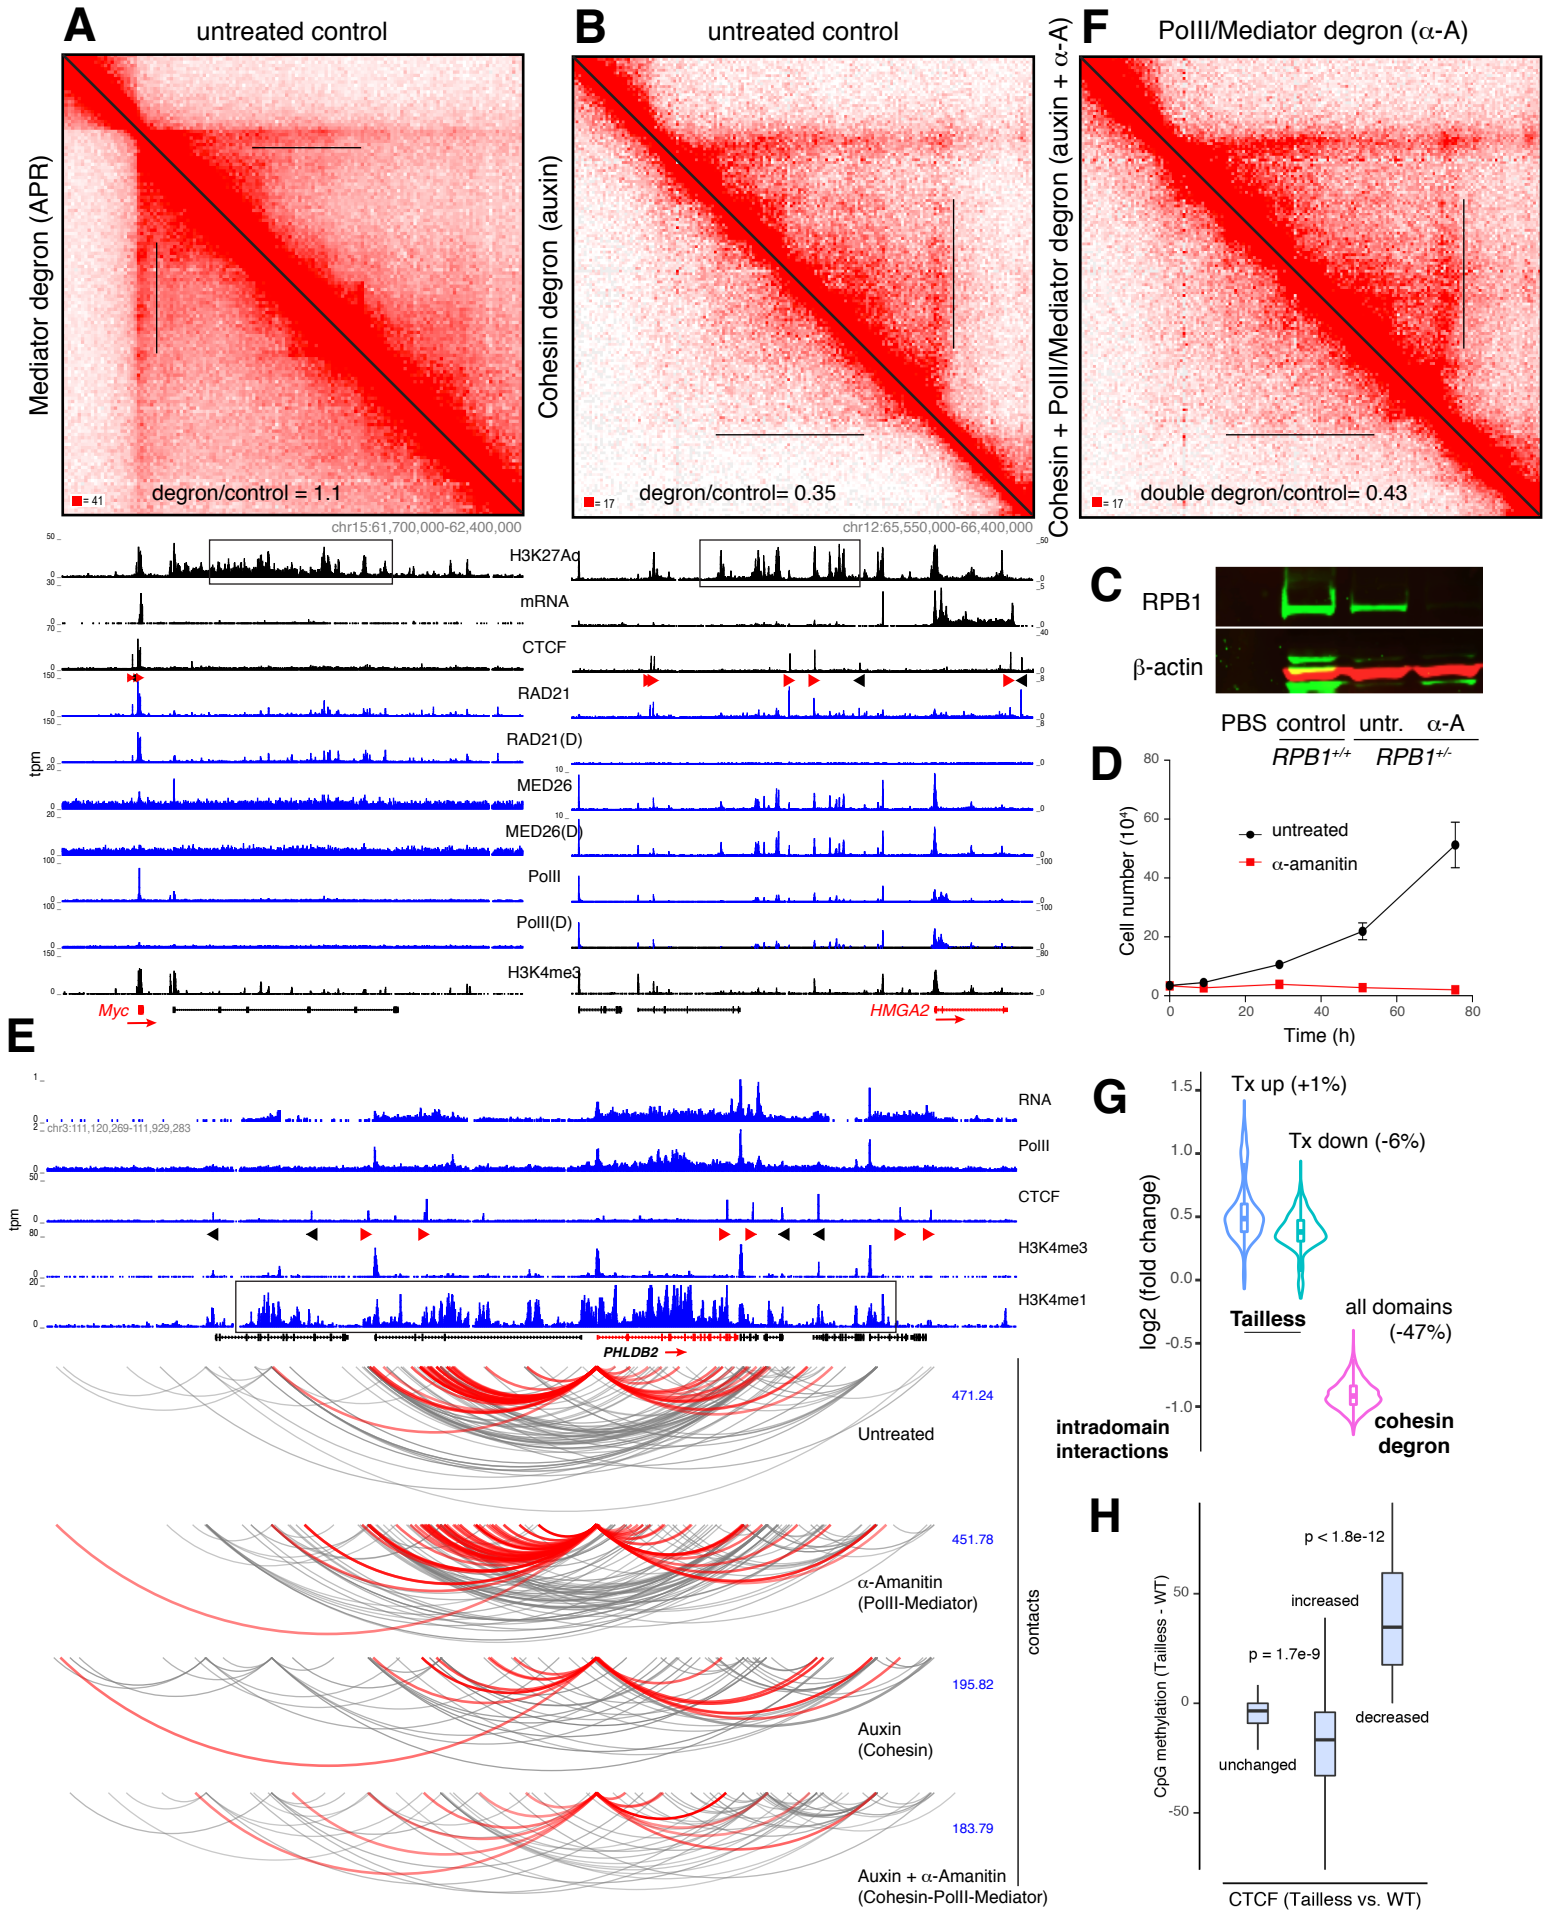

Supplement: NIHMS1537171-supplement-7.pdf [file NIHMS1537171-supplement-7.pdf]
